# Supplementary material for: Clinical characteristics of coronavirus disease (COVID-19) early findings from a teaching hospital in Pavia, North Italy, 21 to 28 February 2020
Source: PubMed Central journal article supplement (PMC7189652; doi:10.2807/1560-7917.es.2020.25.16.2000460), 2020-04-23
Supplement: 2200460_BRUNO_Supplementary_tables.pdf [file 2200460_BRUNO_Supplementary_tables.pdf]

## Disclaimer

This supplementary material is hosted by *Eurosurveillance* as supporting information alongside the article **Clinical characteristics of coronavirus disease (COVID-19) early findings from a teaching hospital in Pavia, North Italy, 21 to 28 February 2020** on behalf of the authors, who remain responsible for the accuracy and appropriateness of the content. The same standards for ethics, copyright, attributions and permissions as for the article apply. Supplements are not edited by *Eurosurveillance* and the journal is not responsible for the maintenance of any links or email addresses provided therein.

**Table S1: Univariate analyses for disease severity and discharge status.**

| Covariates                 | P-values for disease severity | P-values for discharge status |
|----------------------------|-------------------------------|-------------------------------|
| Female sex                 | <b>0.084</b>                  | 0.384                         |
| Age > 65                   | 0.249                         | <b>0.004</b>                  |
| Respiratory frequency > 22 | <b>0.092</b>                  | 0.307                         |
| Fever                      | 0.260                         | 0.132                         |
| Cough                      | 0.847                         | 0.103                         |
| Dyspnea                    | 0.560                         | 0.788                         |
| Diarrhea                   | 0.675                         | 0.542                         |
| Fatigue                    | 0.685                         | 0.815                         |
| Interstitial pneumonia     | 0.722                         | <b>0.002</b>                  |
| Presence of comorbidities  | 0.279                         | <b>0.003</b>                  |
| Tumor                      | <b>0.049</b>                  | 0.670                         |
| Heart disease              | 0.107                         | 0.850                         |
| Hypertension               | 0.397                         | <b>0.033</b>                  |
| Diabetes                   | 0.307                         | 0.492                         |
| Lung disease               | 0.685                         | 0.815                         |
| Hepatitis C virus          | 0.685                         | 0.815                         |
| PF ratio < 260             | <b>0.010</b>                  | 0.423                         |
| Co2 < 35 mmHg              | 0.650                         | 0.230                         |
| pH < 7.45                  | 0.282                         | 0.160                         |
| Leukopenia (WBC<5)         | 1                             | 0.279                         |
| Lymphopenia                | 0.162                         | 0.157                         |
| Thrombocytopenia           | <b>0.025</b>                  | 0.175                         |
| LDH levels                 | <b>0.012</b>                  | <b>0.033</b>                  |
| Creatinine > 1.5           | 0.293                         | 0.852                         |
| CRP elevation              | 0.786                         | 0.135                         |
| PCTI elevation             | 0.324                         | 0.187                         |
| Antiviral therapy          | <b>0.016</b>                  | <b>&lt;0.001</b>              |
| Antibiotic therapy         | 0.137                         | <b>0.0009</b>                 |
| Time from symptom onset    | 0.771                         | 0.665                         |
| Time of hospitalization    | 0.394                         | 0.243                         |

Supplementary table S2. Multivariate model for discharge status

| Covariates | Odds Ratio | 95% Confidence Interval | p-value      |
|------------|------------|-------------------------|--------------|
| Age > 65   | 0.043      | 0.004-0.504             | <b>0.012</b> |

|                                      |       |              |              |
|--------------------------------------|-------|--------------|--------------|
| Interstitial pneumonia               | 0.385 | 0.033-4.531  | 0.448        |
| Presence of at least one comorbidity | 0.141 | 0.005-4.018  | 0.252        |
| LDH levels                           | 0.998 | 0.984-1.013  | 0.875        |
| Antiviral treatment                  | 0.048 | 0.006-0.399  | <b>0.005</b> |
| Antibiotic therapy                   | 0.166 | 0.004-6.1445 | 0.330        |

Hypertension has not been included in the multivariate model to avoid collinearity with the presence of at least one comorbidity.

Supplementary table S3. Multivariate model for severe disease

| Covariates                 | Odds Ratio | 95% Confidence Interval | p-value       |
|----------------------------|------------|-------------------------|---------------|
| Female sex                 | 0.058      | 0.001-1.994             | 0.1148        |
| Respiratory frequency > 22 | 2.673      | 0.364-19.624            | 0.3337        |
| Tumor                      | 22.199     | 0.826-596.152           | 0.0648        |
| Thrombocytopenia           | 1.050      | 0.099-11.128            | 0.9671        |
| LDH levels                 | 1.090      | 1.022-1.163             | <b>0.0080</b> |
| Antiviral treatment        | 3.960      | 0.150-104.561           | 0.4098        |

PF ratio has not been included in the model because it was available in only 25 patients.

Supplementary table S4. Characteristics of patients who have received and who have not received antiviral treatment.

| Covariates                 | Antiviral treatment (n=31) | Not antiviral treatment (n=13) | p-value      |
|----------------------------|----------------------------|--------------------------------|--------------|
| Female sex                 | 9 (29)                     | 7 (53.8)                       | 0.223        |
| Age > 65                   | 20 (64.5)                  | 5 (38.4)                       | 0.208        |
| Respiratory frequency > 22 | 11 (35.5)                  | 2 (15.4)                       | 0.331        |
| Fever                      | 31 (100)                   | 9 (69.2)                       | <b>0.008</b> |
| Cough                      | 14 (45.2)                  | 1 (7.7)                        | <b>0.041</b> |
| Dyspnea                    | 8 (25.8)                   | 2 (15.4)                       | 0.720        |
| Diarrhea                   | 2 (6.5)                    | 1 (7.7)                        | 0.612        |
| Fatigue                    | 2 (6.5)                    | 0 (0)                          | 0.885        |
| Interstitial pneumonia     | 26 (83.9)                  | 5 (38.4)                       | <b>0.008</b> |
| Presence of comorbidities  | 21 (67.7)                  | 7 (53.8)                       | 0.596        |
| Tumor                      | 5 (16.1)                   | 1 (7.7)                        | 0.793        |
| Heart disease              | 7 (22.6)                   | 4 (30.8)                       | 0.845        |
| Hypertension               | 13 (41.9)                  | 2 (15.4)                       | 0.178        |
| Diabetes                   | 4 (19.9)                   | 3 (23.1)                       | 0.697        |
| Lung disease               | 1 (3.2)                    | 1 (7.7)                        | 0.885        |
| Hepatitis C virus          | 1 (3.2)                    | 1 (7.7)                        | 0.885        |
| PF ratio < 260             | 10 (32.2)                  | 0 (0)                          | 0.379        |
| Co2 < 35 mmHg              | 14 (45.2)                  | 2 (15.4)                       | 0.590        |
| pH < 7.45                  | 4 (19.9)                   | 2 (15.4)                       | 0.261        |
| Leukopenia (WBC<5)         | 17 (54.8)                  | 5 (38.4)                       | 0.509        |
| Lymphopenia                | 30 (96.8)                  | 9 (69.2)                       | <b>0.035</b> |
| Thrombocytopenia           | 16 (51.6)                  | 2 (15.4)                       | <b>0.058</b> |

|                              |           |           |                   |
|------------------------------|-----------|-----------|-------------------|
| LDH >300                     | 13 (41.9) | 1 (7.7)   | <b>0.093</b>      |
| Creatinine > 1.5             | 2 (6.5)   | 0 (0)     | 0.925             |
| CRP elevation                | 7 (22.6)  | 1 (7.7)   | 0.522             |
| PCTI elevation               | 6 (19.4)  | 2 (15.4)  | 0.959             |
| Antibiotic therapy           | 29 (74.2) | 3 (23.1)  | <b>&lt;0.0001</b> |
| Mean time from symptom onset | 15.2 ± 8  | 14 ± 5    | 0.549             |
| Mean Time of hospitalization | 8.4 ± 2.0 | 7.2 ± 2.5 | 0.133             |

Supplementary table S5. Multivariate analysis for antiviral treatment

| Covariates             | Odds Ratio | 95% Confidence Interval | p-value |
|------------------------|------------|-------------------------|---------|
| Fever                  | 0.00       | -                       | 0.995   |
| Cough                  | 5.302      | 0.318- 88.250           | 0.244   |
| Interstitial pneumonia | 1.476      | 0.087-25.036            | 0.787   |
| Lymphopenia            | 0.00       | -                       | 0.996   |
| Thrombocytopenia       | 4.278      | 0.245-74.697            | 0.319   |
| LDH>300                | 0.00       | -                       | 0.995   |
| Antibiotic             | 5.059      | 0.120-213.554           | 0.395   |

Supplementary table S6. Characteristics of patients according to LDH levels.

| Covariates                 | LDH > 300 (n=15) | LDH< 300 (n=29) | p-value      |
|----------------------------|------------------|-----------------|--------------|
| Female sex                 | 4 (26.7)         | 10 (34.5)       | 0.845        |
| Age > 65                   | 10 (66.7)        | 14 (48.3)       | 0.383        |
| Respiratory frequency > 22 | 4 (26.7)         | 8 (27.6)        | 0.771        |
| Fever                      | 13 (86.7)        | 24 (82.8)       | 0.882        |
| Cough                      | 7 (46.7)         | 8 (27.6)        | 0.346        |
| Dyspnea                    | 5 (33.3)         | 5 (17.2)        | 0.405        |
| Diarrhea                   | 1 (6.7)          | 1 (3.4)         | 0.780        |
| Fatigue                    | 0 (0)            | 2 (6.9)         | 0.780        |
| Interstitial pneumonia     | 13 (86.7)        | 17 (58.6)       | <b>0.093</b> |
| Presence of comorbidities  | 10 (66.7)        | 17 (58.6)       | 0.845        |
| Tumor                      | 2 (13.3)         | 4 (13.8)        | 0.674        |
| Heart disease              | 4 (26.7)         | 7 (24.1)        | 0.849        |
| Hypertension               | 7 (46.7)         | 8 (27.6)        | 0.346        |
| Diabetes                   | 2 (13.3)         | 5 (17.2)        | 0.923        |
| Lung disease               | 0 (0)            | 2 (6.9)         | 0.780        |
| Hepatitis C virus          | 0 (0)            | 2 (6.9)         | 0.780        |
| PF ratio < 260             | 4 (26.7)         | 11 (37.9)       | 0.327        |
| Co2 < 35 mmHg              | 4 (26.7)         | 11 (37.9)       | 0.327        |
| pH < 7.45                  | 0 (0)            | 6 (20.7)        | <b>0.088</b> |
| Leukopenia (WBC<5)         | 8 (53.3)         | 12 (41.4)       | 0.656        |
| Lymphopenia                | 13 (86.7)        | 24 (82.8)       | 0.882        |
| Thrombocytopenia           | 8 (53.3)         | 10 (34.5)       | 0.369        |
| Creatinine > 1.5           | 1 (6.7)          | 1 (3.4)         | 0.780        |
| CRP elevation              | 3 (20)           | 5 (17.2)        | 0.804        |
| PCTI elevation             | 3 (20)           | 5 (17.2)        | 0.873        |
| Antiviral therapy          | 13 (86.7)        | 17 (58.6)       | <b>0.093</b> |

|                              |            |            |              |
|------------------------------|------------|------------|--------------|
| Antibiotic therapy           | 12 (80)    | 19 (65.5)  | 0.483        |
| Mean time from symptom onset | 16.7 ± 7.4 | 13.4 ± 4.9 | <b>0.083</b> |
| Mean Time of hospitalization | 8.1 ± 2.1  | 6.9 ± 2.5  | 0.110        |
